# Supplementary material
Source: PubMed Central journal article supplement (PMC3057125)
Supplement: NIHMS269183-supplement-Supl_1.pdf [file NIHMS269183-supplement-Supl_1.pdf]

## SUPPLEMENTAL TEXT

### SUPPLEMENTAL MATERIALS AND METHODS

#### **Cytotoxicity of FFAs on human sebocytes**

To examine the effect of FFAs on the cell viability of the human SZ95 sebocytes, the cells ( $1 \times 10^5$ /well) were incubated with LA, PA or OA (25  $\mu$ g/ml) in 1% FBS-Sebomed<sup>®</sup> for 24 hr at 37°C. Control received an equal amount of DMSO (0.5% (v/v)). Triton X-100 (0.01%) was used to achieve 0% of cell viability. After incubation, cell viability of sebocytes was determined with acid phosphatase (ACP) assays (Martin and Clynes, 1991). Cells were washed with PBS three times and incubated with 100  $\mu$ l of 10 mM *p*-nitrophenyl phosphate (*p*NPP) in ACP assay buffer (1 M sodium acetate buffer, pH=5.5, containing 0.1% (w/v) Triton X-100) for 1 h at 37°C. After that, 10  $\mu$ l of 1N NaOH was added to stop the reaction and absorbance at 405 nm was measured. The cell viability was calculated as: (the OD<sub>405</sub> difference between FFA treatment and Triton-X-100 treatment)  $\div$  (the OD<sub>405</sub> difference between no treatment and Triton X-100 treatment)  $\times$  100 (%).

#### ***In vitro* antimicrobial assay**

To determine bactericidal effect of FFAs against *P. acnes*, *P. acnes* ( $1 \times 10^6$  CFU/ml) was incubated with LA, PA or OA at the various concentrations (0-100  $\mu$ g/ml) in PBS on a 96-well

microplate (100  $\mu$ l/well) at 37°C for 5 hr under anaerobic conditions. The control received an equal amount of DMSO (0.5% (v/v)). The reaction mixture was diluted 1:10-1:10<sup>4</sup> with PBS. CFU was determined by spotting 5  $\mu$ l of the dilution on a Brucella broth agar plate.

#### **SUPPLEMENTAL REFERENCE**

Martin A, Clynes M (1991) Acid phosphatase: endpoint for in vitro toxicity tests. *In Vitro Cell Dev Biol* 27A:183-184.

#### **SUPPLEMENTAL FIGURE LEGENDS**

**Figure S1. Effect of FFAs on the cell viability of the human SZ95 sebocytes.** The immortalized human SZ95 sebocytes ( $1 \times 10^5$  cells/well) were incubated with LA, PA or OA (25  $\mu$ g/ml) in 1% FBS-Sebomed<sup>®</sup> for 24 hr at 37°C. As a background, Triton X-100 (0.1% (v/v)) was added to achieve 0% of cell cytotoxicity. After incubation, cell viability of sebocytes was determined with *p*NPPas described in SUPPLEMENTAL MATERIALS AND METHODS. Data represent mean  $\pm$  SE of five individual experiments (\* $P < 0.05$  by Student's *t*-test).

**Figure S2. Bactericidal effects of LA, PA and OA on *P. acnes*.** *P. acnes* ( $1 \times 10^6$  CFU/ml) was incubated with 0-100  $\mu$ g/ml of LA, PA or OA in 0.5% DMSO in PBS for 5 hr under anaerobic

conditions. After incubation, *P. acnes* suspension was diluted 1:10 -1:10<sup>4</sup> with PBS, and 5 µl of the dilutions was spotted on a Brucella Broth agar plate supplemented with 5% defibrinated sheep blood and hemin and vitamin K. After liquid in the *P. acnes* suspension was absorbed into the agar, the plate was incubated under anaerobic conditions to quantify CFU of *P. acnes*. Data represent mean ± SE of three individual experiments. UD: undetectable

**Figure S3. Pre-incubation with anti-CD36 IgGs or BMS-345541 and subsequent incubation with FFAs did not affect the cell viability of the human SZ95 sebocytes.**

(a-b) The effects of pre-treatment with anti-CD36 IgGs or BMS-345541 and subsequent incubation with FFAs on the cell viability of the SZ95 sebocytes were examined. The cells (2×10<sup>6</sup>/well) cultured on a 24-well plate were preincubated with mouse anti-CD36 IgG (5 µg/ml) or normal mouse IgG in 1% FBS-Sebomed<sup>®</sup> (250 µl) for 2 hr at 37°C (a). The cells (2×10<sup>6</sup>/well) cultured on a 24-well plate were preincubated with BMS-345541 (20 µM) or an equal amount of DMSO (0.1%) in 1% FBS-Sebomed<sup>®</sup> (250 µl) for 1 hr at 37°C (b). After preincubation, LA, PA or OA (25 µg/ml) was added to the cells, which were subsequently incubated for 24 hr at 37 °C. Control received an equal amount of DMSO (0.5% (v/v)). After incubation, cell viability of sebocytes was determined with *p*NPP as described in SUPPLEMENTAL MATERIALS AND METHODS. Data represent mean ± SE of six individual experiments.

**Figure S4. Effect of FFAs on the hBD-2 expression in human keratinocytes.**

The human keratinocyte cell line, HaCaT, ( $1 \times 10^6$ /well) were incubated with LA, PA, or OA (25  $\mu\text{g/ml}$ ) in 1% FBS-DMEM containing 0.5% (w/v) DMSO for 24 hr at 37°C. The control received an equal amount of DMSO. mRNA expression of hBD-2 was evaluated by real-time qPCR, normalized to that of GAPDH, and then plotted as relative expression compared to vehicle-treated cells. Data represent mean  $\pm$  SE of three individual experiments  $**P < 0.01$ ,  $***P < 0.005$  by Student's *t*-test, vs. vehicle control).

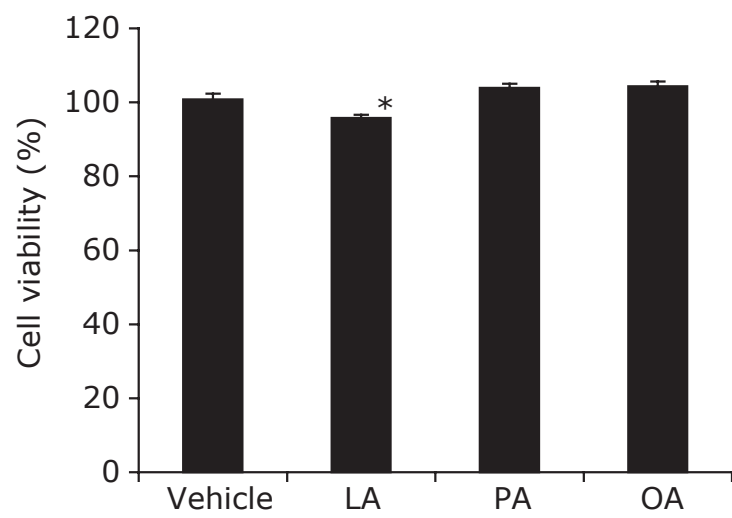

Figure S1

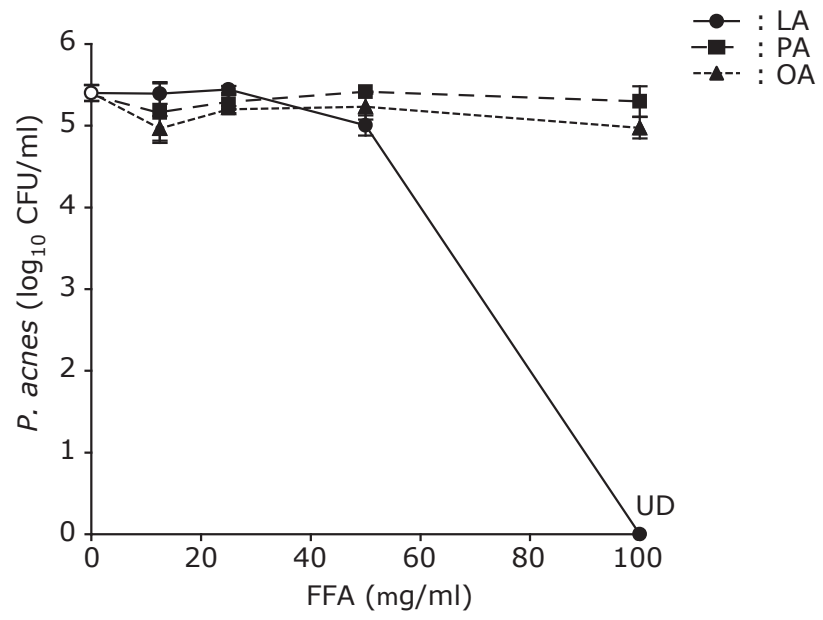

Figure S2

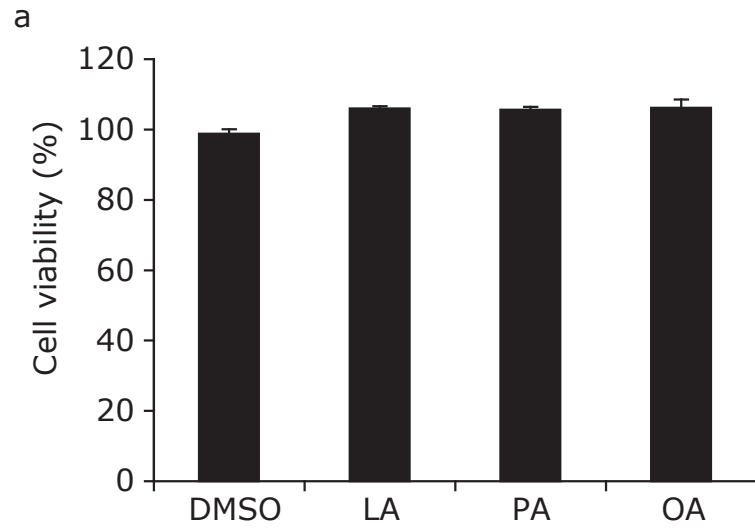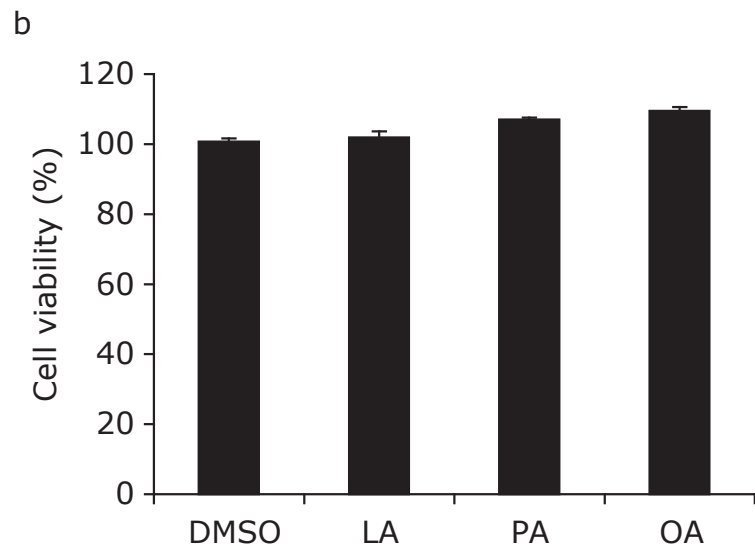

Figure S3

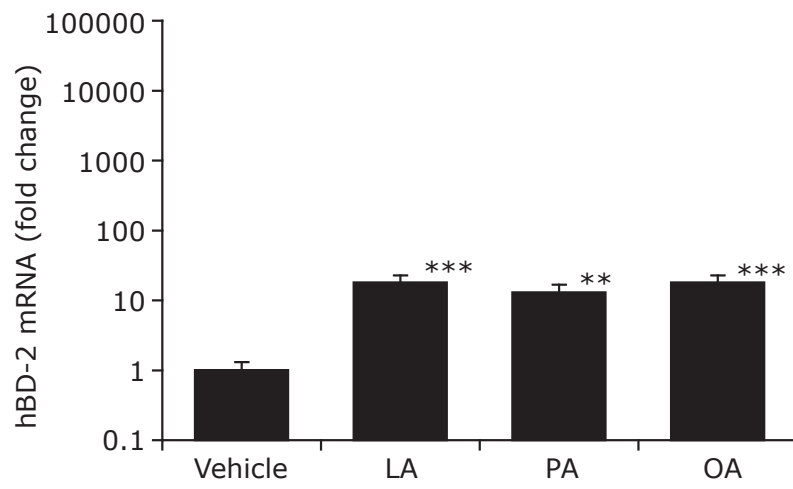

Figure S4
